# Supplementary material for: From “Outsider” to “Anchor”: A Qualitative Descriptive Study of Male Nursing Students’ Professional Identity Construction During Clinical Internships in China
Source: Research Square preprint supplement (doi:10.21203/rs.3.rs-8295520/v1), 2026-01-09
Supplement: Supplementary file 1 [file ba4970c275f4472d628c80a0.docx]

**Interview Guide**

1. Please describe your experience when you first transitioned from school to the hospital internship. How would you describe the relationship or difference between the actual clinical work and what you learned in the classroom? Please share a specific example to illustrate this.

2. Please discuss your experiences as a male nursing student in the clinical setting. How, if at all, do you feel your gender has influenced your daily work, learning, and interactions with others?

3. During your internship, what typically happened when you encountered difficult situations or difficulties? Please describe a specific incident and how you navigated that situation.

4. Looking back on this internship journey, how do you perceive the nursing profession now? What are your current thoughts or considerations regarding your future career path?
